# Supplementary material
Source: Research Square preprint supplement (doi:10.21203/rs.3.rs-10012281/v1)
Supplement: Supplementary file 1 [file efb3f72a65baa8514f93168a.docx]

**From Objective AI Literacy Assessment to Training Needs Mapping in Greek Secondary Education**

# Supplementary materials

The following materials should supplementary and a link will also be provided to this data.

**Table S1.** Omnibus Kruskal-Wallis tests for Sum Score. Dependent variable: AI literacy objective knowledge test total score (Sum Score).

| **Predictor (grouping variable)** | **k** | **Group Ns (n)** | **N** | **χ²** | **df** | **p** | **ε²** |
| --- | --- | --- | --- | --- | --- | --- | --- |
| AI training exposure (AI Levels) | 6 | 106, 32, 15, 5, 14, 99 | 271 | 39.1 | 5 | < .001 | 0.145 |
| PC/Internet familiarity | 3 | 4, 98, 169 | 271 | 10.4 | 2 | 0.005 | 0.0386 |
| Specialty | 9 | 11, 77, 28, 56, 37, 22, 10, 10, 20 | 271 | 43.5 | 8 | < .001 | 0.161 |
| ICT training level (ICT Levels) | 5 | 42, 56, 74, 85, 14 | 271 | 27.8 | 4 | < .001 | 0.103 |
| ***Note.*** *χ² is the Kruskal-Wallis test statistic. ε² denotes epsilon-squared effect size. Group Ns correspond to the category counts for each predictor (see descriptives table for full labels). Across these predictors, there were no missing values (effective N = 271 for all tests).* | | | | | | | |

**Table S2a.** Post-hoc DS-CF Pairwise Comparisons (Significant Only) -*PC / Internet Familiarity*

| ***Pair (A vs B)*** | ***W*** | ***p (adjusted)*** | ***Median [IQR] A*** | ***Median [IQR] B*** | ***Direction*** |
| --- | --- | --- | --- | --- | --- |
| Quite a bit vs Very much | 4.330 | 0.006 | 15 [4] | 17 [5] | Quite a bit > Very much |
| ***Notes****: Dwass-Steel-Critchlow-Fligner (DS-CF) pairwise comparisons from jamovi. Reported p values are adjusted as provided by jamovi. Direction is determined from group medians (not from the sign of W). Only comparisons with p < .05 are shown for concision.* | | | | | |

**Table S2b.** Post-hoc DS-CF Pairwise Comparisons (Significant Only) - *ICT Levels*

| ***Pair (A vs B)*** | ***W*** | ***p (adjusted)*** | ***Median [IQR] A*** | ***Median [IQR] B*** | ***Direction*** |
| --- | --- | --- | --- | --- | --- |
| Basic vs Advanced | 6.186 | < .001 | 15 [4.75] | 18 [3] | Advanced > Basic |
| Moderate vs High | 5.446 | 0.001 | 16 [3.25] | 18 [3] | High > Moderate |
| Very good vs High | 5.193 | 0.002 | 15 [4] | 18 [3] | High > Very good |
| ***Notes****: Dwass-Steel-Critchlow-Fligner (DS-CF) pairwise comparisons from jamovi. Reported p values are adjusted as provided by jamovi. Direction is determined from group medians (not from the sign of W). Only comparisons with p < .05 are shown for concision.* | | | | | |

**Table S2c.** Post-hoc DS-CF Pairwise Comparisons (Significant Only) -*AI Training Exposure (AI Levels)*

| ***Pair (A vs B)*** | ***W*** | ***p (adjusted)*** | ***Median [IQR] A*** | ***Median [IQR] B*** | ***Direction*** |
| --- | --- | --- | --- | --- | --- |
| Short seminar / Workshop vs Undergraduate course | 4.1741 | 0.037 | 16 [4] | 21 [2] | Undergraduate course > Short seminar / Workshop |
| Short seminar / Workshop vs None of the above | -4.2070 | 0.035 | 16 [4] | 15 [5] | Short seminar / Workshop > None of the above |
| Semester / Annual Seminar vs None of the above | -5.6701 | < .001 | 18 [3.25] | 15 [5] | Semester / Annual Seminar > None of the above |
| Certified Knowledge vs None of the above | -4.8557 | 0.008 | 18 [2] | 15 [5] | Certified Knowledge > None of the above |
| Προπτυχιακό μάθημα vs Τίποτε από τα παραπάνω | -4.6143 | 0.014 | 21 [2] | 15 [5] | Undergraduate course > None of the above |
| Μεταπτυχιακό μάθημα vs Τίποτε από τα παραπάνω | -4.3786 | 0.024 | 18 [3.75] | 15 [5] | Postgraduate course > None of the above |
| ***Notes****: Dwass-Steel-Critchlow-Fligner (DS-CF) pairwise comparisons from jamovi. Reported p values are adjusted as provided by jamovi. Direction is determined from group medians (not from the sign of W). Only comparisons with p < .05 are shown for concision.* | | | | | |

**Table S2d.** Post-hoc DS-CF Pairwise Comparisons (Significant Only) -*Specialty*

| **Pair (A vs B)** | **W** | **p (adjusted)** | **Median [IQR] A** | **Median [IQR] B** | **Direction** |
| --- | --- | --- | --- | --- | --- |
| Greek Literature vs ICT | 7.5174 | < .001 | 15 [5] | 18 [3] | ICT > Greek Literature |
| Mathematics vs ICT | 5.3066 | 0.005 | 16 [3.5] | 18 [3] | ICT > Mathematics |
| Science vs ICT | 5.0445 | 0.011 | 17 [3] | 18 [3] | ICT > Science |
| ICT vs Foreign Literature | -5.5205 | 0.003 | 18 [3] | 14 [4.5] | ICT > Foreign Literature |
| ICT vs Culture & Activities | -5.1827 | 0.008 | 18 [3] | 13.5 [2.75] | ICT > Culture & Activities |
| ICT vs Technical & Technological Direction | -5.6865 | 0.002 | 18 [3] | 15 [5] | ICT > Technical & Technological Direction |
| ***Notes****: Dwass-Steel-Critchlow-Fligner (DS-CF) pairwise comparisons from jamovi. Reported p values are adjusted as provided by jamovi. Direction is determined from group medians (not from the sign of W). Only comparisons with p < .05 are shown for concision.* | | | | | |

**Table S3.** Sensitivity analysis: OLS regression with HC1 robust standard errors**.** Dependent variable: Sum Score. HC1 heteroskedasticity-consistent standard errors. N = 271. R² = 0.1286, Adjusted R² = 0.1054.

| ***Predictor*** | ***b*** | ***HC1 SE*** | ***t*** | ***p*** | ***95% CI (Lower)*** | ***95% CI (Upper)*** |
| --- | --- | --- | --- | --- | --- | --- |
| (Intercept) | 14.6421 | 0.5878 | 24.91 | <2e-16 | 13.48477 | 15.7994 |
| ICT Level 2: Linear trend (.L) | 1.8546 | 0.7017 | 2.64 | 0.0087 | 0.47286 | 3.2363 |
| ICT Level 2: Quadratic trend (.Q) | -0.2225 | 0.6565 | -0.34 | 0.7350 | -1.51507 | 1.0702 |
| ICT Level 2: Cubic trend (.C) | -0.7864 | 0.5033 | -1.56 | 0.1193 | -1.77736 | 0.2045 |
| ICT Level 2: Quartic trend (^4) | -0.7091 | 0.4124 | -1.72 | 0.0867 | -1.52107 | 0.1029 |
| PC / Internet Familiarity: Linear trend (.L) | 0.3011 | 0.8613 | 0.35 | 0.7269 | -1.39474 | 1.9970 |
| PC / Internet Familiarity: Quadratic trend (.Q) | -0.1208 | 0.5109 | -0.24 | 0.8132 | -1.12682 | 0.8852 |
| AI training exposure (AI_Lev_Comp) | 0.2628 | 0.0951 | 2.76 | 0.0062 | 0.07542 | 0.4501 |
| ***Note****. Ordered predictors (ICT Level 2 and PC / Internet Familiarity) were modeled using polynomial contrasts in R; the linear trend term (.L) captures the primary monotonic association. AI training exposure was reverse-coded (AI_Lev_Comp = 7 - AI_Lev_ORD) so that higher values indicate greater exposure.* | | | | | | |

**Table S4.** Full item-level NeedIndex table for all 26 items (NeedIndex = 1 - pcorrect) with priority bands.

| ***Rank*** | ***Item*** | ***pcorrect*** | ***NeedIndex*** | ***Priority band*** |
| --- | --- | --- | --- | --- |
| 1 | Q06 | 9.2% | 90.8% | Very high |
| 2 | Q15 | 29.5% | 70.5% | Very high |
| 3 | Q14 | 29.9% | 70.1% | Very high |
| 4 | Q08 | 32.8% | 67.2% | Very high |
| 5 | Q01 | 35.8% | 64.2% | Very high |
| 6 | Q09 | 36.9% | 63.1% | Very high |
| 7 | Q12 | 37.3% | 62.7% | Very high |
| 8 | Q18 | 42.4% | 57.6% | High |
| 9 | Q25 | 43.5% | 56.5% | High |
| 10 | Q03 | 53.9% | 46.1% | High |
| 11 | Q05 | 62.4% | 37.6% | Moderate |
| 12 | Q16 | 63.8% | 36.2% | Moderate |
| 13 | Q21 | 66.1% | 33.9% | Moderate |
| 14 | Q19 | 69.0% | 31.0% | Moderate |
| 15 | Q22 | 70.8% | 29.2% | Moderate |
| 16 | Q07 | 71.6% | 28.4% | Moderate |
| 17 | Q02 | 73.1% | 26.9% | Moderate |
| 18 | Q23 | 73.4% | 26.6% | Moderate |
| 19 | Q26 | 78.2% | 21.8% | Moderate |
| 20 | Q13 | 81.2% | 18.8% | Low |
| 21 | Q10 | 83.0% | 17.0% | Low |
| 22 | Q24 | 86.0% | 14.0% | Low |
| 23 | Q11 | 86.7% | 13.3% | Low |
| 24 | Q04 | 87.1% | 12.9% | Low |
| 25 | Q17 | 88.9% | 11.1% | Low |
| 26 | Q20 | 89.7% | 10.3% | Low |
